# Supplementary material
Source: publisher site journal article supplement (https://www.dovepress.com/article/568141)
Supplement: Supplementary file 1 [file 568141%20Supplementary%20Files.docx]

**Supplementary Files**

Table S1. JBI Results

| **Criteria** | **Asch et al. (2022)53** | **Athilingam et al. (2017) 42** | **Bakitas et al. (2020)14** | **Bashi et al. (2016) 33** | **Boriani et al. (2017) 34** | **Chaundry et al. (2010) 35** | **Clays et al. (2021) 13** | **Davoudi et al. (2020) 17** | **Ding et al. (2020) 43** | **Dorsch et al. (2021) 36** | **Ferrante et al. (2010) 38** | **Galinier et al. (2020) 37** | **Ghalager et al. (2017) 45** | **Hale et al. (2016) 39** | **Hwang et al. (2017) 46** |
| --- | --- | --- | --- | --- | --- | --- | --- | --- | --- | --- | --- | --- | --- | --- | --- |
| True randomization used for assignment? | Yes | Yes | Yes | Yes | Yes | Yes | Yes | Yes | Yes | Yes | Yes | Yes | Yes | Yes | Yes |
| Allocation to treatment groups concealed? | Yes | Yes | Yes | Yes | Yes | Yes | Yes | Yes | Yes | Yes | Yes | Yes | Yes | Yes | Yes |
| Were treatment groups similar at baseline? | Yes | Yes | Yes | Yes | Yes | Yes | Yes | Yes | Yes | Yes | Yes | Yes | Yes | Yes | Yes |
| Participants blind to treatment assignment? | Yes | Yes | Yes | Unclear | Unclear | Unclear | Yes | Unclear | Yes | No | No | Unclear | Yes | Unclear | Yes |
| Those delivering treatment blind to treatment assignment? | Yes | Yes | Yes | Yes | Yes | Yes | Yes | Yes | Yes | Yes | Yes | Yes | Yes | Yes | Yes |
| Outcomes assessors blind to treatment assignment? | Yes | Yes | Yes | Yes | Yes | Yes | Yes | Yes | Yes | Yes | Unclear | Yes | Yes | Yes | Yes |
| Were treatment groups treated identically other than intervention? | Yes | Yes | Yes | Yes | Yes | Yes | Yes | Yes | Yes | Yes | Yes | Yes | Yes | Yes | Yes |
| Was follow-up complete? | Yes | Yes | Yes | Yes | Yes | Yes | Yes | Yes | Yes | Yes | Yes | Yes | Yes | Yes | Yes |
| Were participants analyzed in the groups to which they were randomized? | Yes | Yes | Yes | Yes | Yes | Yes | Yes | Yes | Yes | Yes | Yes | Yes | Yes | Yes | Yes |
| Outcomes measured in the same way for treatment groups? | Yes | Yes | Yes | Yes | Yes | Yes | Yes | Yes | Yes | Yes | Yes | Yes | Yes | Yes | Yes |
| Were outcomes measured reliably? | Yes | Yes | Yes | Yes | Yes | Yes | Yes | Yes | Yes | Yes | Yes | Yes | Yes | Yes | Yes |
| Appropriate statistical analysis used? | Yes | Yes | Yes | Yes | Yes | Yes | Yes | Yes | Yes | Yes | Yes | Yes | Yes | Yes | Yes |
| Trial design appropriate? | Yes | Yes | Yes | Yes | Yes | Yes | Yes | Yes | Yes | Yes | Yes | Yes | Yes | Yes | Yes |
| **TOTAL SCORE** | 13/13 | 13/13 | 13/13 | 12/13 | 12/13 | 12/13 | 13/13 | 12/13 | 13/13 | 12/13 | 11/13 | 12/13 | 13/13 | 12/13 | 13/13 |

| **Criteria** | **Kitsiou et al. (2025) 51** | **Kohler et al. (2024) 15** | **Mirshahi et al. (2024) 47** | **Peng et al. (2018) 50** | **Piette et al. (2015) 55** | **Piotowithc et al. (2020) 40** | **Piotrowitch et al. (2024) 66** | **Rahimi et al. (2020) 44** | **Ribiro et al. (2025) 48** | **Scher et al. (2025) 54** | **Seto et al. (2012) 16** | **Victoria et al. (2024) 49** | **Vourinem et al. (2014) 41** |
| --- | --- | --- | --- | --- | --- | --- | --- | --- | --- | --- | --- | --- | --- |
| True randomization used? | Yes | Yes | Yes | Yes | Yes | Yes | Yes | Yes | Yes | Yes | Yes | Yes | Yes |
| Allocation concealed? | Yes | Yes | Yes | Yes | Yes | Yes | Yes | Yes | Yes | Yes | Yes | Yes | Yes |
| Treatment groups similar at baseline? | Yes | Yes | Yes | Yes | Yes | Yes | Yes | Yes | Yes | Yes | Yes | Yes | Yes |
| Participants blind to treatment? | Yes | Yes | Yes | Yes | Yes | Yes | Unclear | Yes | Yes | Yes | Yes | Yes | Unclear |
| Those delivering treatment blind to treatment? | Yes | Yes | Yes | Yes | Yes | Yes | Yes | Yes | Yes | Yes | Yes | Yes | Yes |
| Outcomes assessors blind to treatment? | Yes | Yes | Yes | Yes | Yes | Yes | Yes | Yes | Yes | Yes | Yes | Yes | Yes |
| Treatment groups treated identically other than intervention? | Yes | Yes | Yes | Yes | Yes | Yes | Yes | Yes | Yes | Yes | Yes | Yes | Yes |
| Follow-up complete and adequately analyzed? | Yes | Yes | Yes | Yes | Yes | Yes | Yes | Yes | Yes | Yes | Yes | Yes | Yes |
| Participants analyzed in their randomized groups? | Yes | Yes | Yes | Yes | Yes | Yes | Yes | Yes | Yes | Yes | Yes | Yes | Yes |
| Outcomes measured in the same way across groups? | Yes | Yes | Yes | Yes | Yes | Yes | Yes | Yes | Yes | Yes | Yes | Yes | Yes |
| Outcomes measured reliably? | Yes | Yes | Yes | Yes | Yes | Yes | Yes | Yes | Yes | Yes | Yes | Yes | Yes |
| Appropriate statistical analysis used? | Yes | Yes | Yes | Yes | Yes | Yes | Yes | Yes | Yes | Yes | Yes | Yes | Yes |
| Trial design appropriate? | Yes | Yes | Yes | Yes | Yes | Yes | Yes | Yes | Yes | Yes | Yes | Yes | Yes |
| TOTAL SCORE | 13/13 | 13/13 | 13/13 | 13/13 | 13/13 | 13/13 | 12/13 | 13/13 | 13/13 | 13/13 | 13/13 | 13/13 | 12/13 |
